# Supplementary material
Source: Research Square preprint supplement (doi:10.21203/rs.3.rs-10147582/v1)
Supplement: Supplementary file 1 [file 9157645f6ec86219e43f755d.docx]

# Appendix A. Bootstrap confidence intervals

High-frequency trade observations are not independent. The same wallet trades repeatedly, and trades cluster in time, so naive standard errors that treat each trade as an independent draw are too narrow. Confidence intervals are therefore computed by resampling at the level of the dependence rather than the level of the individual trade. For the pooled cohort test of Table 4, the sample window is partitioned into consecutive five-minute time blocks; the bootstrap draws blocks with replacement to the original number of blocks, and the pooled pre, post and post-minus-pre means are recomputed on each draw. For the per-wallet distribution of Table 5 and the split-sample persistence statistics of Table 6, the bootstrap draws whole wallets with replacement to the original number of wallets, and the statistic of interest is recomputed on each draw, so that all trades of a resampled wallet move together. Each interval below is the 2.5th to 97.5th percentile of 2,000 bootstrap replications. The point estimates recomputed by the bootstrap procedure reproduce the headline pooled pre and post values exactly, confirming that the resampling is applied to the same statistics reported in the main tables.

**Table A1. Pooled cohort lead test, block-bootstrap 95% intervals**

At two seconds: pre +1.731 [+1.663, +1.799], post +0.604 [+0.562, +0.643], difference -1.127 [-1.198, -1.056]. At five seconds: pre +2.043 [+1.962, +2.127], post +0.654 [+0.601, +0.709], difference -1.388 [-1.478, -1.301]. At ten seconds: pre +2.371 [+2.264, +2.483], post +0.720 [+0.643, +0.799], difference -1.651 [-1.760, -1.547]. All values in basis points; n = 2,337,051 cohort trades across 6,811 five-minute blocks.

**Table A2. Split-sample persistence, wallet-cluster-bootstrap 95% intervals**

Spearman rank correlation between half-1 and half-2 lead scores: +0.477 [+0.401, +0.552] at two seconds, +0.548 [+0.475, +0.613] at five seconds, +0.532 [+0.462, +0.604] at ten seconds. Quintile-five half-2 mean lead: +0.452 [+0.149, +0.835] at two seconds, +0.785 [+0.314, +1.198] at five seconds, +0.729 [+0.172, +1.344] at ten seconds. All correlations and leads computed on the 588 wallets with at least 100 cohort trades in each half; leads in basis points.

**Table A3. Per-wallet lead distribution at five seconds, wallet-cluster-bootstrap 95% intervals**

Among 644 wallets with at least 200 cohort trades: lead-tilt fraction 24.2 per cent [20.8, 27.6], clean-anticipator fraction 9.2 per cent [7.0, 11.5], median wallet lead -0.687 basis points [-0.791, -0.578].

# Appendix B. Cointegration and spread-stationarity diagnostics

The Hasbrouck information-share decomposition assumes the two venue log-mids are cointegrated with a single common stochastic trend, so the imposed cointegrating vector (1, -1)' should yield a stationary spread. This assumption is tested directly in each information-share window. For each window, an augmented Dickey-Fuller test is applied to each venue's log-mid and to the spread, and an Engle-Granger test is applied to the pair. All series are sampled on the same five-second grid used for the information-share estimates.

The individual log-mid series carry a unit root in every window, as expected for a price: augmented Dickey-Fuller p-values range from 0.37 to 0.70 for the Hyperliquid series and from 0.38 to 0.65 for the Binance series, so the null of a unit root is not rejected. The spread is stationary in three of the four windows. In the 12 June, 16 June and 15 June windows the spread augmented Dickey-Fuller statistic rejects the unit root with p < 0.001, and the Engle-Granger test rejects no-cointegration with p < 0.001, so the (1, -1) restriction and the vector error-correction model are well specified. In the 20 June window the Engle-Granger test still rejects no-cointegration with p < 0.001, indicating that the two series are cointegrated, but the augmented Dickey-Fuller statistic on the imposed (1, -1) spread is borderline at p = 0.098. This pattern is consistent with cointegration under a coefficient slightly different from unity in that hour, that is, a small persistent basis between the two perpetuals, rather than an absence of a common trend. The information share for the 20 June window is therefore read with caution, while the directional conclusion that Binance holds the majority share is unaffected, since it holds in every window including those with a strictly stationary spread.

**Table B1. Stationarity and cointegration tests by window (five-second grid)**

Augmented Dickey-Fuller p-values (log-mid Hyperliquid; log-mid Binance; spread) and Engle-Granger p-value, by window. 20 June, 1 h: 0.699; 0.654; 0.098; <0.001. 12 June, 1 h: 0.520; 0.381; <0.001; <0.001. 16 June, 1 h: 0.581; 0.561; <0.001; <0.001. 15 June, 6 h: 0.374; 0.397; <0.001; <0.001. A unit-root price (high ADF p) with a stationary spread (low ADF p) and Engle-Granger rejection indicates a well-specified cointegrated system.
